# Supplementary material for: Study of Atmospheric Forcing Influence on Harbour Water Renewal
Source: MDPI journal article supplement (doi:10.3390/w15101813), 2023-05-10
Supplement: s1 [file s1]

Archive with 1 entries (1 files):
- water-2318086-supplementary.pdf
